# Supplementary material for: Cloud-point extraction associated with voltammetry: preconcentration and elimination of the sample matrix for trace determination of methyl parathion in honey
Source: Royal Society of Chemistry journal article supplement (doi:10.1039/d0ay02057e), 2020-01-01
Supplement: d0ay02057e1.pdf [file d0ay02057e1.pdf]

**Supporting Information:**

**Cloud-point extraction associated to voltammetry:  
Preconcentration and elimination of sample matrix for trace  
determination of methyl parathion in honey**

Priscila A. R. de Sousa <sup>1</sup>, André L. Squissato <sup>2</sup>, Rodrigo A. A. Munoz <sup>2</sup>, Luciana M. Coelho <sup>1</sup>,  
Edmar I. de Melo <sup>2</sup>, Rodrigo A. B. da Silva <sup>2\*</sup>.

<sup>1</sup> Federal University of Goiás, Av. Dr. Lamartine Pinto de Avelar, 1120, CEP 75704-020,  
Catalão, GO, Brazil.

<sup>2</sup> Institute of Chemistry, Federal University of Uberlândia, Av. João Naves de Ávila, 2121,  
CEP 38408-100, Uberlândia, MG, Brazil.

\*E-mail: rodamorimsilva@gmail.com / rabsilva@ufu.br.

Tel.: 55-34-3810-1099.

Fax: 55-34-3239-4208.

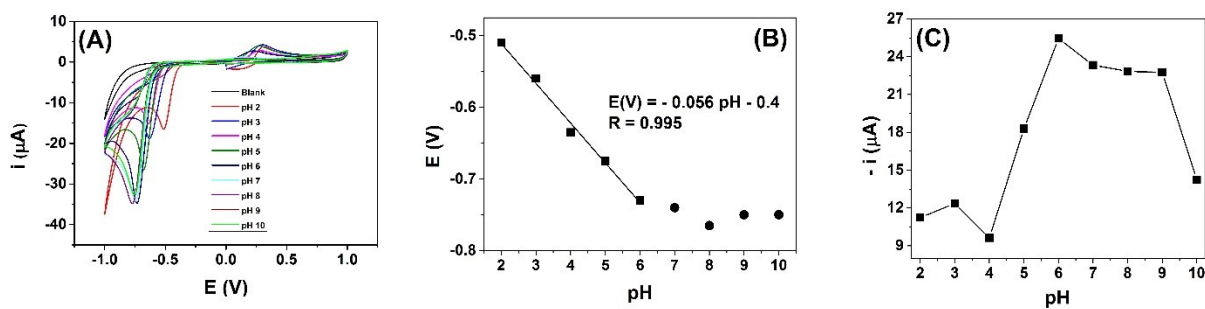

**Fig. ESI 1**(A) Cyclic voltammograms for 100  $\mu\text{mol L}^{-1}$  methyl parathion in BR buffer solutions (pH range 2.0 to 10.0) over H-BDDE. (B) Plot of the dependence of  $E$  (V) vs. pH and respective slope of the linear regression equation. (C) Plot of the dependence of  $i$  ( $\mu\text{A}$ ) vs. pH. Scan rate = 50  $\text{mVs}^{-1}$ .

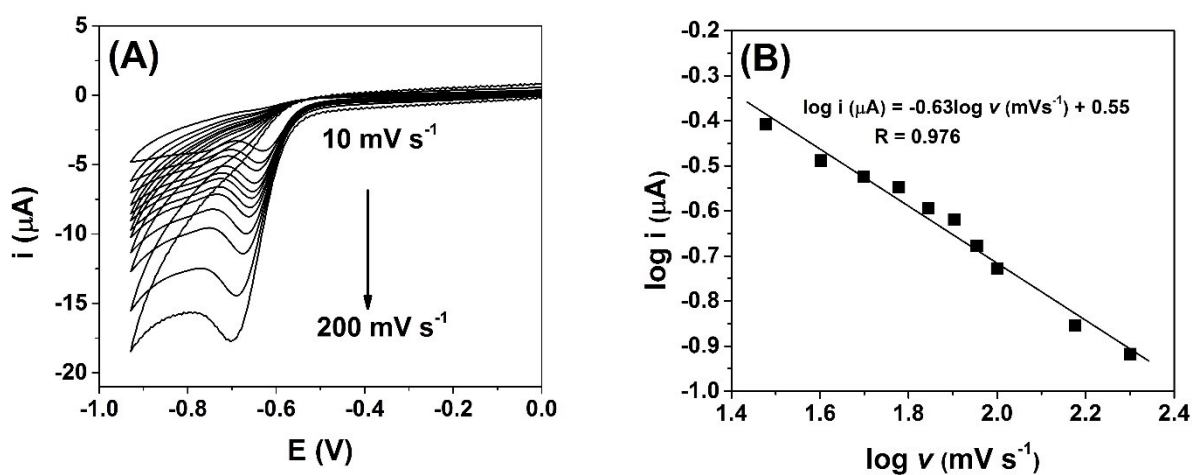

**Fig. ESI 2**(A) Cyclic voltammograms of 50  $\mu\text{mol L}^{-1}$  MP on H-BDDE at different scan rates (10 to 200  $\text{mV s}^{-1}$ ). (B) Plot of the dependence of  $\log i$  vs.  $\log v$  and respective linear regression equation. Supporting Electrolyte: BR buffer pH 6.

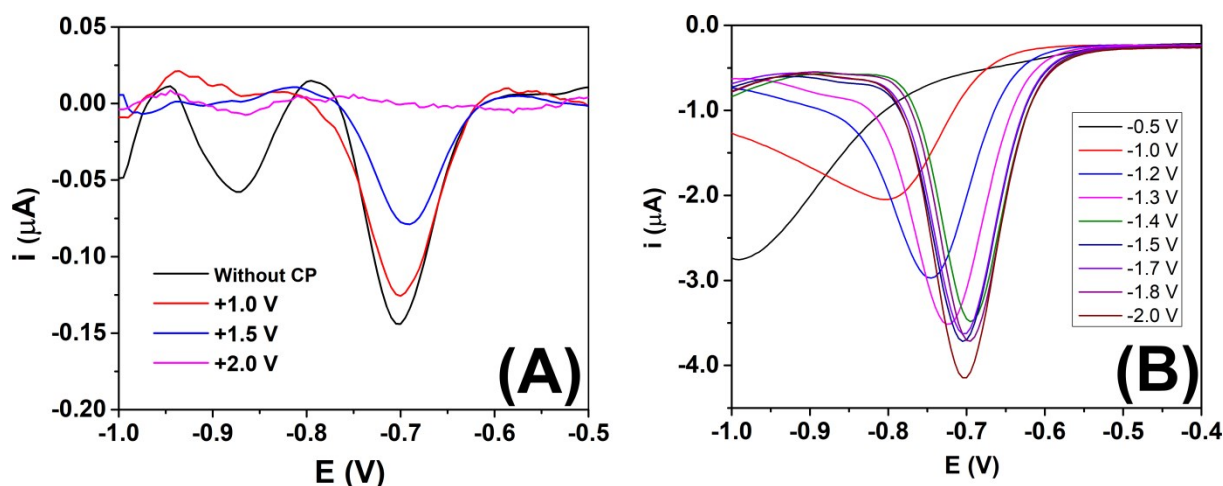

**Fig. ESI 3**(A) SWV blank in BR buffer pH 6 (after the scan of a  $5.0 \mu\text{mol L}^{-1}$  MP) without and after apply conditioning potentials (+1.0 to +2.0 V) on BDDE. (B) SWV curves in the presence of  $5.0 \mu\text{mol L}^{-1}$  MP and BR buffer pH 6 after the application of activation potential (-0.5 V to -2.0 V) in BDDE. SWV conditions: Frequency: 30 Hz; Amplitude: 50 mV; Step potential: 7 mV; Conditioning potential **(B)**: +2.0 V (for 15 s); Stirring rate: 2000 rpm.

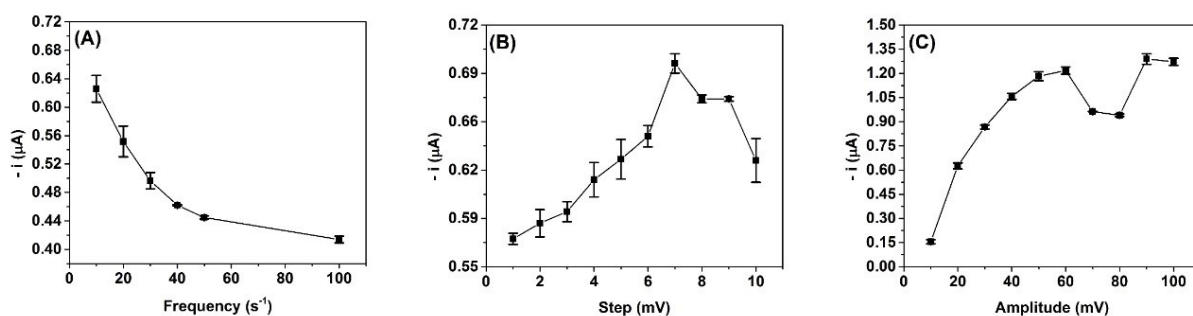

**Fig. ESI 4** Variation of peak currents ( $\pm$  SD,  $n=3$ ) from SWV curves measured in the presence of  $5 \mu\text{mol L}^{-1}$  MP and BR buffer pH 6 as function of frequency **(A)**, step **(B)** and amplitude **(C)**. Cleaning potential: +2.0 V (for 15 s), Activation potential: -2.0 V (for 15 s); Equilibration time: 15 s; Stirring rate: 2000 rpm.

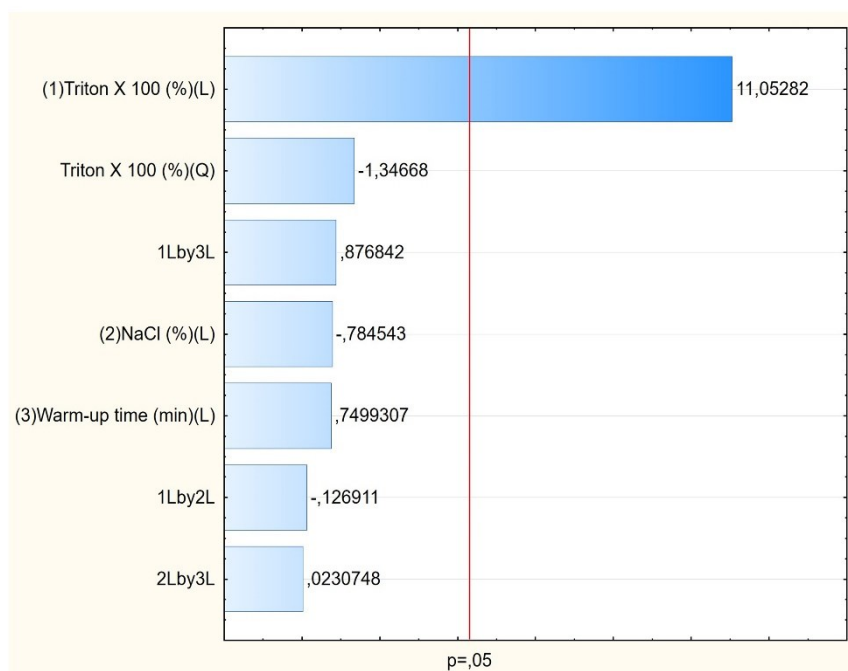

**Fig. ESI 5** Pareto chart of the variable effects based on the data in Table 1 for preconcentration of methyl paration.

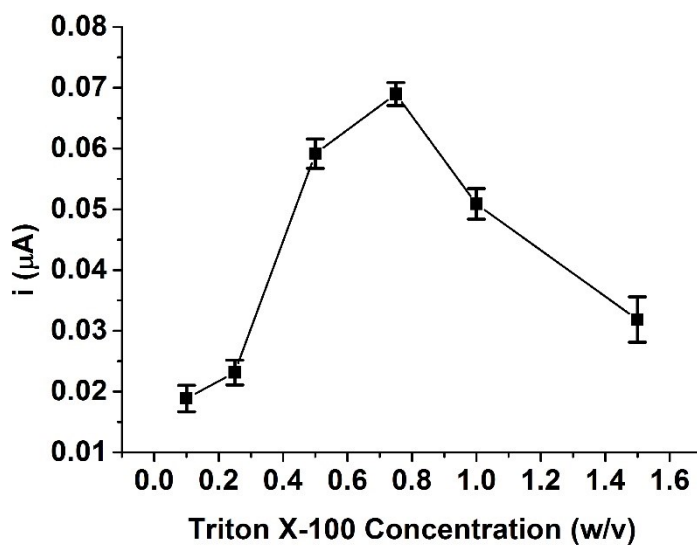

**Fig. ESI 6** Optimization of Triton X-100 concentration and its analytical MP response on BDD. Optimized conditions: 0.1 mol L<sup>-1</sup> Britton-Robinson (BR) buffer pH 6.0; Frequency: 30 Hz; Amplitude: 50 mV; Step potential: 7 mV; Conditioning potential: +2.0 V (for 15 s), Activation potential: -2.0 V (for 15 s); equilibration time: 15 s and stirring rate: 2000 rpm.

**Table ESI 1.** Optimization of the SWV parameters for the determination of MP using the cathodically pre-treated boron-doped electrode.

| Parameters                            | Studied range | Optimized value |
|---------------------------------------|---------------|-----------------|
| Stirring rate (rpm)                   | 250 to 2500   | 2000            |
| Conditioning (Cleaning) potential (V) | +1.0 to +2.0  | +2.0            |
| Conditioning (Cleaning) time (s)      | 5 to 30       | 15              |
| Activation potential (V)              | −0.5 to −2.0  | −2.0            |
| Activation time (s)                   | 15 to 180     | 15              |
| Equilibration time (s)                | 15 to 30      | 15              |
| Step (mV)                             | 1 to 10       | 7               |
| Amplitude (mV)                        | 10 to 100     | 50              |
| Frequency (Hz)                        | 10 to 100     | 30              |

**Table ESI 2.** Analytical characteristics of the method for determination of MP using cathodically pre-treated boron-doped electrode.

| Analytical parameters                                      | Obtained Value |
|------------------------------------------------------------|----------------|
| Sensitivity ( $\mu\text{A } \mu\text{mol}^{-1} \text{L}$ ) | 0.154          |
| Limit of detection ( $\mu\text{mol L}^{-1}$ )              | 0.03           |
| Limit of quantification ( $\mu\text{mol L}^{-1}$ )         | 0.1            |
| Linear range ( $\mu\text{mol L}^{-1}$ )                    | 0.5 to 16      |
| R                                                          | 0.998          |
| Repeatability (n = 15 for $0.5 \mu\text{mol L}^{-1}$ )     | 3.9 %          |
| Repeatability (n = 15 for $5 \mu\text{mol L}^{-1}$ )       | 1.4 %          |
| Inter-day (n = 3)                                          | 5.2 %          |
| Intra-day (n = 3)                                          | 3.6 %          |
| Inter-electrode (n = 2)                                    | 5.0 %          |
